# Supplementary material for: On the cause of low thermal stability of ethyl halodiazoacetates
Source: PubMed Central journal article supplement (PMC4979875; doi:10.3762/bjoc.12.155), 2016-07-26
Supplement: Beilstein_J_Org_Chem-12-1590-s002.pdf [file Beilstein_J_Org_Chem-12-1590-s002.pdf]

**Supporting Information File 2**  
**for**  
**On the cause of low thermal stability of ethyl**  
**halodiazoacetates**

Magnus Mortén, Martin Hennem and Tore Bonge-Hansen\*

Address: Department of Chemistry, University of Oslo, P.O. Box 1033 Blindern, NO-0315  
Oslo, Norway

Email: Tore Bonge-Hansen\* - [tore.hansen@kjemi.uio.no](mailto:tore.hansen@kjemi.uio.no)

\*Corresponding author

**DFT calculations**

|                                              |     |
|----------------------------------------------|-----|
| General information.....                     | S2  |
| Ethyl diazoacetate ( <b>1</b> ) .....        | S3  |
| Diethyl diazomalonate ( <b>2e</b> ) .....    | S7  |
| Ethyl diazofluoroacetate ( <b>2d</b> ) ..... | S11 |
| Ethyl chlorodiazoacetate ( <b>2a</b> ) ..... | S15 |
| Ethyl bromodiazoacetate ( <b>2b</b> ) .....  | S19 |

### **General information**

All calculations were performed with the Gaussian 09 program, using the hybrid functional B3LYP. All geometry optimizations were carried out with a cc-pVTZ basis set for all atoms without any constraint. Solvation effects (toluene) were included during the optimization with the SMD method, as implemented in Gaussian 09. Each stationary point was identified as either a minimum or a saddle point by analytical calculation of the frequencies. The connectivity among reactant, transition state (TS), and product was verified by following the intrinsic reaction coordinates (IRC). The Gibbs energies were calculated within the harmonic approximation of frequencies at  $T = 298.15$  K and  $p = 1$  atm. The NBO analysis was carried out using NBO 3.1.

**Ethyl diazoacetate (1)**

|                                              |                             |
|----------------------------------------------|-----------------------------|
| Zero-point correction=                       | 0.104291 (Hartree/Particle) |
| Thermal correction to Energy=                | 0.112809                    |
| Thermal correction to Enthalpy=              | 0.113753                    |
| Thermal correction to Gibbs Free Energy=     | 0.070602                    |
| Sum of electronic and zero-point Energies=   | -416.009457                 |
| Sum of electronic and thermal Energies=      | -416.000940                 |
| Sum of electronic and thermal Enthalpies=    | -415.999995                 |
| Sum of electronic and thermal Free Energies= | -416.043146                 |

---

| Center<br>Number | Atomic<br>Number | Atomic<br>Type | Coordinates (Angstroms) |           |           |
|------------------|------------------|----------------|-------------------------|-----------|-----------|
|                  |                  |                | X                       | Y         | Z         |
| 1                | 6                | 0              | 0.227051                | 0.187984  | 0.000000  |
| 2                | 8                | 0              | 0.384074                | 1.391884  | 0.000005  |
| 3                | 8                | 0              | -0.970666               | -0.427581 | -0.000002 |
| 4                | 6                | 0              | 1.294599                | -0.797199 | -0.000004 |
| 5                | 6                | 0              | -2.138553               | 0.432013  | 0.000004  |
| 6                | 1                | 0              | -2.100935               | 1.070526  | -0.882344 |
| 7                | 1                | 0              | -2.100933               | 1.070518  | 0.882357  |
| 8                | 6                | 0              | -3.361597               | -0.452785 | 0.000001  |
| 9                | 1                | 0              | -3.390334               | -1.088395 | 0.885498  |
| 10               | 1                | 0              | -4.257365               | 0.170290  | 0.000008  |
| 11               | 1                | 0              | -3.390339               | -1.088384 | -0.885504 |
| 12               | 7                | 0              | 2.521368                | -0.356475 | -0.000003 |
| 13               | 7                | 0              | 3.571205                | 0.041604  | -0.000002 |
| 14               | 1                | 0              | 1.155631                | -1.864958 | -0.000009 |

---

## Ethyl diazoacetate TS

|                                              |                             |
|----------------------------------------------|-----------------------------|
| Zero-point correction=                       | 0.099313 (Hartree/Particle) |
| Thermal correction to Energy=                | 0.108843                    |
| Thermal correction to Enthalpy=              | 0.109787                    |
| Thermal correction to Gibbs Free Energy=     | 0.063556                    |
| Sum of electronic and zero-point Energies=   | -415.948224                 |
| Sum of electronic and thermal Energies=      | -415.938694                 |
| Sum of electronic and thermal Enthalpies=    | -415.937750                 |
| Sum of electronic and thermal Free Energies= | -415.983981                 |

---

| Center<br>Number | Atomic<br>Number | Atomic<br>Type | Coordinates (Angstroms) |           |           |
|------------------|------------------|----------------|-------------------------|-----------|-----------|
|                  |                  |                | X                       | Y         | Z         |
| 1                | 6                | 0              | -0.044204               | 1.080516  | -0.004732 |
| 2                | 8                | 0              | -0.668235               | 2.144373  | -0.011579 |
| 3                | 8                | 0              | -0.546349               | -0.137069 | 0.013949  |
| 4                | 6                | 0              | 1.323149                | 1.412950  | -0.177832 |
| 5                | 6                | 0              | -2.006078               | -0.244430 | -0.000236 |
| 6                | 1                | 0              | -2.373813               | 0.259198  | -0.892925 |
| 7                | 1                | 0              | -2.395246               | 0.271571  | 0.876178  |
| 8                | 6                | 0              | -2.354116               | -1.711667 | 0.006739  |
| 9                | 1                | 0              | -1.971059               | -2.204513 | 0.900412  |
| 10               | 1                | 0              | -3.439314               | -1.821592 | -0.004104 |
| 11               | 1                | 0              | -1.951626               | -2.217083 | -0.871130 |
| 12               | 7                | 0              | 2.461447                | -0.654125 | 0.156388  |
| 13               | 7                | 0              | 3.045809                | -1.533628 | -0.117306 |
| 14               | 1                | 0              | 1.784437                | 1.744042  | 0.755406  |

---

### Singlet carbene from ethyl diazoacetate

|                                              |                             |
|----------------------------------------------|-----------------------------|
| Zero-point correction=                       | 0.092229 (Hartree/Particle) |
| Thermal correction to Energy=                | 0.099126                    |
| Thermal correction to Enthalpy=              | 0.100070                    |
| Thermal correction to Gibbs Free Energy=     | 0.061374                    |
| Sum of electronic and zero-point Energies=   | -306.388564                 |
| Sum of electronic and thermal Energies=      | -306.381667                 |
| Sum of electronic and thermal Enthalpies=    | -306.380723                 |
| Sum of electronic and thermal Free Energies= | -306.419419                 |

---

| Center<br>Number | Atomic<br>Number | Atomic<br>Type | Coordinates (Angstroms) |           |           |
|------------------|------------------|----------------|-------------------------|-----------|-----------|
|                  |                  |                | X                       | Y         | Z         |
| 1                | 6                | 0              | -1.072939               | -0.104571 | 0.001920  |
| 2                | 8                | 0              | -1.480189               | 1.068066  | -0.022936 |
| 3                | 8                | 0              | 0.158907                | -0.538078 | 0.046623  |
| 4                | 6                | 0              | -2.269807               | -0.812312 | -0.168391 |
| 5                | 6                | 0              | 1.223668                | 0.473867  | 0.045390  |
| 6                | 1                | 0              | 1.134627                | 1.056258  | 0.961147  |
| 7                | 1                | 0              | 1.063407                | 1.130674  | -0.807662 |
| 8                | 6                | 0              | 2.540156                | -0.254934 | -0.037245 |
| 9                | 1                | 0              | 2.610293                | -0.840287 | -0.953894 |
| 10               | 1                | 0              | 3.350505                | 0.475313  | -0.035641 |
| 11               | 1                | 0              | 2.679186                | -0.919885 | 0.815085  |
| 12               | 1                | 0              | -2.794220               | -0.954281 | 0.781422  |

---

### Triplet carbene from ethyl diazoacetate

|                                              |                             |
|----------------------------------------------|-----------------------------|
| Zero-point correction=                       | 0.092086 (Hartree/Particle) |
| Thermal correction to Energy=                | 0.098893                    |
| Thermal correction to Enthalpy=              | 0.099837                    |
| Thermal correction to Gibbs Free Energy=     | 0.060107                    |
| Sum of electronic and zero-point Energies=   | -306.394040                 |
| Sum of electronic and thermal Energies=      | -306.387232                 |
| Sum of electronic and thermal Enthalpies=    | -306.386288                 |
| Sum of electronic and thermal Free Energies= | -306.426018                 |

---

| Center<br>Number | Atomic<br>Number | Atomic<br>Type | Coordinates (Angstroms) |           |           |
|------------------|------------------|----------------|-------------------------|-----------|-----------|
|                  |                  |                | X                       | Y         | Z         |
| 1                | 6                | 0              | 1.122983                | -0.012579 | -0.000001 |
| 2                | 8                | 0              | 1.399688                | 1.178779  | -0.000002 |
| 3                | 8                | 0              | -0.122699               | -0.504189 | 0.000000  |
| 4                | 6                | 0              | 2.142454                | -1.014193 | 0.000000  |
| 5                | 6                | 0              | -1.207307               | 0.462293  | 0.000000  |
| 6                | 1                | 0              | -1.107519               | 1.093987  | -0.882745 |
| 7                | 1                | 0              | -1.107515               | 1.093991  | 0.882741  |
| 8                | 6                | 0              | -2.506694               | -0.304665 | 0.000003  |
| 9                | 1                | 0              | -2.593179               | -0.934566 | 0.885561  |
| 10               | 1                | 0              | -3.339925               | 0.399426  | 0.000003  |
| 11               | 1                | 0              | -2.593183               | -0.934570 | -0.885552 |
| 12               | 1                | 0              | 3.216784                | -0.900134 | 0.000000  |

---

## Diethyl diazomalonate (2e)

|                                              |                             |
|----------------------------------------------|-----------------------------|
| Zero-point correction=                       | 0.175817 (Hartree/Particle) |
| Thermal correction to Energy=                | 0.189913                    |
| Thermal correction to Enthalpy=              | 0.190857                    |
| Thermal correction to Gibbs Free Energy=     | 0.133860                    |
| Sum of electronic and zero-point Energies=   | -683.238948                 |
| Sum of electronic and thermal Energies=      | -683.224852                 |
| Sum of electronic and thermal Enthalpies=    | -683.223907                 |
| Sum of electronic and thermal Free Energies= | -683.280905                 |

---

| Center<br>Number | Atomic<br>Number | Atomic<br>Type | Coordinates (Angstroms) |           |           |
|------------------|------------------|----------------|-------------------------|-----------|-----------|
|                  |                  |                | X                       | Y         | Z         |
| 1                | 6                | 0              | -0.000001               | -0.022558 | 0.000000  |
| 2                | 6                | 0              | -1.308499               | -0.696582 | 0.039258  |
| 3                | 6                | 0              | 1.308497                | -0.696584 | -0.039258 |
| 4                | 7                | 0              | 0.000001                | 1.295478  | 0.000000  |
| 5                | 7                | 0              | 0.000012                | 2.413047  | 0.000000  |
| 6                | 8                | 0              | -1.465540               | -1.889731 | 0.088660  |
| 7                | 8                | 0              | 1.465537                | -1.889733 | -0.088660 |
| 8                | 8                | 0              | 2.307935                | 0.208855  | -0.014987 |
| 9                | 8                | 0              | -2.307937               | 0.208857  | 0.014987  |
| 10               | 6                | 0              | 3.661409                | -0.315883 | -0.065563 |
| 11               | 1                | 0              | 3.796038                | -0.829705 | -1.017496 |
| 12               | 1                | 0              | 3.779566                | -1.044954 | 0.734737  |
| 13               | 6                | 0              | -3.661411               | -0.315881 | 0.065564  |
| 14               | 1                | 0              | -3.796040               | -0.829703 | 1.017497  |
| 15               | 1                | 0              | -3.779568               | -1.044952 | -0.734737 |
| 16               | 6                | 0              | -4.611396               | 0.846500  | -0.087282 |
| 17               | 1                | 0              | -4.464160               | 1.354315  | -1.040909 |
| 18               | 1                | 0              | -5.637880               | 0.478580  | -0.053470 |
| 19               | 1                | 0              | -4.484973               | 1.572411  | 0.716387  |
| 20               | 6                | 0              | 4.611394                | 0.846498  | 0.087282  |
| 21               | 1                | 0              | 4.464158                | 1.354314  | 1.040908  |
| 22               | 1                | 0              | 5.637878                | 0.478578  | 0.053470  |
| 23               | 1                | 0              | 4.484970                | 1.572409  | -0.716388 |

---

## Diethyl diazomalonate TS

|                                              |                             |
|----------------------------------------------|-----------------------------|
| Zero-point correction=                       | 0.170802 (Hartree/Particle) |
| Thermal correction to Energy=                | 0.186089                    |
| Thermal correction to Enthalpy=              | 0.187033                    |
| Thermal correction to Gibbs Free Energy=     | 0.126227                    |
| Sum of electronic and zero-point Energies=   | -683.183528                 |
| Sum of electronic and thermal Energies=      | -683.168241                 |
| Sum of electronic and thermal Enthalpies=    | -683.167297                 |
| Sum of electronic and thermal Free Energies= | -683.228104                 |

---

| Center<br>Number | Atomic<br>Number | Atomic<br>Type | Coordinates (Angstroms) |           |           |
|------------------|------------------|----------------|-------------------------|-----------|-----------|
|                  |                  |                | X                       | Y         | Z         |
| 1                | 6                | 0              | 1.269021                | -0.859822 | -0.292887 |
| 2                | 8                | 0              | 1.541032                | -2.046795 | -0.287388 |
| 3                | 8                | 0              | 2.073499                | 0.127211  | 0.099104  |
| 4                | 6                | 0              | 0.001423                | -0.499868 | -0.873959 |
| 5                | 6                | 0              | 3.411156                | -0.266454 | 0.529477  |
| 6                | 1                | 0              | 3.894681                | -0.791667 | -0.293175 |
| 7                | 1                | 0              | 3.315116                | -0.953995 | 1.368562  |
| 8                | 6                | 0              | 4.152605                | 0.990396  | 0.912534  |
| 9                | 1                | 0              | 3.655711                | 1.509167  | 1.732552  |
| 10               | 1                | 0              | 5.159987                | 0.726609  | 1.237580  |
| 11               | 1                | 0              | 4.236429                | 1.673145  | 0.066842  |
| 12               | 7                | 0              | 0.004615                | 1.689080  | -0.755046 |
| 13               | 7                | 0              | 0.007467                | 2.702388  | -1.159767 |
| 14               | 6                | 0              | -1.276732               | -0.852469 | -0.314277 |
| 15               | 8                | 0              | -1.561529               | -2.036290 | -0.344792 |
| 16               | 8                | 0              | -2.070704               | 0.132204  | 0.102633  |
| 17               | 6                | 0              | -3.411574               | -0.258816 | 0.526175  |
| 18               | 1                | 0              | -3.319899               | -0.965304 | 1.349937  |
| 19               | 1                | 0              | -3.901111               | -0.761953 | -0.306599 |
| 20               | 6                | 0              | -4.141488               | 0.995467  | 0.938583  |
| 21               | 1                | 0              | -4.221991               | 1.697432  | 0.108467  |
| 22               | 1                | 0              | -5.150064               | 0.732794  | 1.260796  |
| 23               | 1                | 0              | -3.638292               | 1.492251  | 1.768394  |

---



### Singlet carbene from diethyl diazomalonate

|                                              |                             |
|----------------------------------------------|-----------------------------|
| Zero-point correction=                       | 0.163300 (Hartree/Particle) |
| Thermal correction to Energy=                | 0.175451                    |
| Thermal correction to Enthalpy=              | 0.176395                    |
| Thermal correction to Gibbs Free Energy=     | 0.123198                    |
| Sum of electronic and zero-point Energies=   | -573.630016                 |
| Sum of electronic and thermal Energies=      | -573.617865                 |
| Sum of electronic and thermal Enthalpies=    | -573.616921                 |
| Sum of electronic and thermal Free Energies= | -573.670119                 |

---

| Center<br>Number | Atomic<br>Number | Atomic<br>Type | Coordinates (Angstroms) |           |           |
|------------------|------------------|----------------|-------------------------|-----------|-----------|
|                  |                  |                | X                       | Y         | Z         |
| 1                | 6                | 0              | -0.000001               | -0.882505 | 0.885881  |
| 2                | 6                | 0              | 1.253445                | -0.813207 | 0.198034  |
| 3                | 6                | 0              | -1.253449               | -0.813213 | 0.198035  |
| 4                | 8                | 0              | 1.650179                | -1.849553 | -0.305533 |
| 5                | 8                | 0              | -1.650188               | -1.849560 | -0.305524 |
| 6                | 8                | 0              | -1.880855               | 0.351309  | 0.251631  |
| 7                | 8                | 0              | 1.880858                | 0.351310  | 0.251638  |
| 8                | 6                | 0              | -3.231845               | 0.410376  | -0.312319 |
| 9                | 1                | 0              | -3.834053               | -0.356999 | 0.171493  |
| 10               | 1                | 0              | -3.166702               | 0.184997  | -1.375613 |
| 11               | 6                | 0              | 3.231843                | 0.410372  | -0.312323 |
| 12               | 1                | 0              | 3.166689                | 0.185003  | -1.375618 |
| 13               | 1                | 0              | 3.834050                | -0.357013 | 0.171477  |
| 14               | 6                | 0              | 3.765100                | 1.797310  | -0.057252 |
| 15               | 1                | 0              | 3.810057                | 2.012096  | 1.010356  |
| 16               | 1                | 0              | 4.774815                | 1.872686  | -0.463323 |
| 17               | 1                | 0              | 3.146547                | 2.553818  | -0.540148 |
| 18               | 6                | 0              | -3.765089               | 1.797321  | -0.057255 |
| 19               | 1                | 0              | -3.146536               | 2.553820  | -0.540165 |
| 20               | 1                | 0              | -4.774808               | 1.872700  | -0.463316 |
| 21               | 1                | 0              | -3.810033               | 2.012117  | 1.010351  |

---

### Triplet carbene from diethyl diazomalonate

|                                              |                             |
|----------------------------------------------|-----------------------------|
| Zero-point correction=                       | 0.163782 (Hartree/Particle) |
| Thermal correction to Energy=                | 0.176492                    |
| Thermal correction to Enthalpy=              | 0.177436                    |
| Thermal correction to Gibbs Free Energy=     | 0.121672                    |
| Sum of electronic and zero-point Energies=   | -573.630028                 |
| Sum of electronic and thermal Energies=      | -573.617318                 |
| Sum of electronic and thermal Enthalpies=    | -573.616374                 |
| Sum of electronic and thermal Free Energies= | -573.672138                 |

---

| Center<br>Number | Atomic<br>Number | Atomic<br>Type | Coordinates (Angstroms) |           |           |
|------------------|------------------|----------------|-------------------------|-----------|-----------|
|                  |                  |                | X                       | Y         | Z         |
| 1                | 6                | 0              | 0.000000                | -0.220824 | -0.000008 |
| 2                | 6                | 0              | -1.299054               | 0.336539  | -0.290157 |
| 3                | 6                | 0              | 1.299052                | 0.336537  | 0.290152  |
| 4                | 8                | 0              | -1.433542               | 1.394513  | -0.874199 |
| 5                | 8                | 0              | 1.433538                | 1.394505  | 0.874207  |
| 6                | 8                | 0              | 2.297063                | -0.455746 | -0.110321 |
| 7                | 8                | 0              | -2.297061               | -0.455750 | 0.110311  |
| 8                | 6                | 0              | 3.649176                | -0.002139 | 0.181692  |
| 9                | 1                | 0              | 3.749544                | 0.097126  | 1.262565  |
| 10               | 1                | 0              | 3.785970                | 0.981873  | -0.265658 |
| 11               | 6                | 0              | -3.649176               | -0.002139 | -0.181687 |
| 12               | 1                | 0              | -3.749553               | 0.097136  | -1.262558 |
| 13               | 1                | 0              | -3.785965               | 0.981869  | 0.265672  |
| 14               | 6                | 0              | -4.607418               | -1.019637 | 0.385887  |
| 15               | 1                | 0              | -4.492779               | -1.110260 | 1.466140  |
| 16               | 1                | 0              | -5.630749               | -0.704350 | 0.177458  |
| 17               | 1                | 0              | -4.455367               | -2.000600 | -0.064530 |
| 18               | 6                | 0              | 4.607421                | -1.019634 | -0.385882 |
| 19               | 1                | 0              | 4.492792                | -1.110246 | -1.466137 |
| 20               | 1                | 0              | 5.630751                | -0.704350 | -0.177441 |
| 21               | 1                | 0              | 4.455365                | -2.000600 | 0.064525  |

---

**Ethyl diazofluoroacetate (2d)**

|                                              |                             |
|----------------------------------------------|-----------------------------|
| Zero-point correction=                       | 0.096205 (Hartree/Particle) |
| Thermal correction to Energy=                | 0.105725                    |
| Thermal correction to Enthalpy=              | 0.106669                    |
| Thermal correction to Gibbs Free Energy=     | 0.060519                    |
| Sum of electronic and zero-point Energies=   | -515.267622                 |
| Sum of electronic and thermal Energies=      | -515.258101                 |
| Sum of electronic and thermal Enthalpies=    | -515.257157                 |
| Sum of electronic and thermal Free Energies= | -515.303307                 |

---

| Center<br>Number | Atomic<br>Number | Atomic<br>Type | Coordinates (Angstroms) |           |           |
|------------------|------------------|----------------|-------------------------|-----------|-----------|
|                  |                  |                | X                       | Y         | Z         |
| 1                | 6                | 0              | -0.044456               | -0.447145 | 0.000003  |
| 2                | 8                | 0              | -0.142497               | -1.657251 | 0.000003  |
| 3                | 8                | 0              | 1.094217                | 0.250482  | 0.000003  |
| 4                | 6                | 0              | -1.199178               | 0.431376  | -0.000002 |
| 5                | 6                | 0              | 2.326825                | -0.523814 | 0.000006  |
| 6                | 1                | 0              | 2.331010                | -1.161829 | -0.883043 |
| 7                | 1                | 0              | 2.331008                | -1.161825 | 0.883058  |
| 8                | 6                | 0              | 3.478531                | 0.450380  | 0.000005  |
| 9                | 1                | 0              | 3.459291                | 1.086104  | 0.885326  |
| 10               | 1                | 0              | 4.417475                | -0.105131 | 0.000011  |
| 11               | 1                | 0              | 3.459297                | 1.086095  | -0.885322 |
| 12               | 7                | 0              | -2.398905               | -0.066314 | -0.000006 |
| 13               | 7                | 0              | -3.443005               | -0.497856 | -0.000009 |
| 14               | 9                | 0              | -1.120978               | 1.777238  | -0.000004 |

---

### Ethyl diazofluoroacetate TS

|                                              |                             |
|----------------------------------------------|-----------------------------|
| Zero-point correction=                       | 0.092905 (Hartree/Particle) |
| Thermal correction to Energy=                | 0.102714                    |
| Thermal correction to Enthalpy=              | 0.103658                    |
| Thermal correction to Gibbs Free Energy=     | 0.056632                    |
| Sum of electronic and zero-point Energies=   | -515.231693                 |
| Sum of electronic and thermal Energies=      | -515.221885                 |
| Sum of electronic and thermal Enthalpies=    | -515.220941                 |
| Sum of electronic and thermal Free Energies= | -515.267967                 |

---

| Center<br>Number | Atomic<br>Number | Atomic<br>Type | Coordinates (Angstroms) |           |           |
|------------------|------------------|----------------|-------------------------|-----------|-----------|
|                  |                  |                | X                       | Y         | Z         |
| 1                | 6                | 0              | 0.113520                | -0.689653 | -0.247393 |
| 2                | 8                | 0              | 0.665678                | -1.765317 | -0.183566 |
| 3                | 8                | 0              | 0.703794                | 0.492076  | -0.407840 |
| 4                | 6                | 0              | -1.384801               | -0.675784 | -0.414803 |
| 5                | 6                | 0              | 2.158428                | 0.507278  | -0.538052 |
| 6                | 1                | 0              | 2.355724                | 1.393445  | -1.136859 |
| 7                | 1                | 0              | 2.463623                | -0.377049 | -1.092935 |
| 8                | 6                | 0              | 2.833689                | 0.586726  | 0.812979  |
| 9                | 1                | 0              | 2.631321                | -0.299902 | 1.412490  |
| 10               | 1                | 0              | 3.913261                | 0.657971  | 0.669069  |
| 11               | 1                | 0              | 2.507025                | 1.468962  | 1.364094  |
| 12               | 7                | 0              | -1.848698               | 1.074070  | 0.151934  |
| 13               | 7                | 0              | -2.383345               | 2.016910  | -0.007800 |
| 14               | 9                | 0              | -1.947493               | -1.407306 | 0.536674  |

---

### Singlet carbene from ethyl diazofluoroacetate

|                                              |                             |
|----------------------------------------------|-----------------------------|
| Zero-point correction=                       | 0.085123 (Hartree/Particle) |
| Thermal correction to Energy=                | 0.092993                    |
| Thermal correction to Enthalpy=              | 0.093937                    |
| Thermal correction to Gibbs Free Energy=     | 0.052250                    |
| Sum of electronic and zero-point Energies=   | -405.686128                 |
| Sum of electronic and thermal Energies=      | -405.678258                 |
| Sum of electronic and thermal Enthalpies=    | -405.677314                 |
| Sum of electronic and thermal Free Energies= | -405.719001                 |

---

| Center<br>Number | Atomic<br>Number | Atomic<br>Type | Coordinates (Angstroms) |           |           |
|------------------|------------------|----------------|-------------------------|-----------|-----------|
|                  |                  |                | X                       | Y         | Z         |
| 1                | 6                | 0              | 0.649122                | 0.367565  | 0.147826  |
| 2                | 8                | 0              | 0.796639                | 1.540071  | -0.119599 |
| 3                | 8                | 0              | -0.465667               | -0.330222 | 0.179680  |
| 4                | 6                | 0              | 1.880481                | -0.339355 | 0.632861  |
| 5                | 6                | 0              | -1.716798               | 0.378113  | -0.122540 |
| 6                | 1                | 0              | -1.624461               | 0.809578  | -1.117557 |
| 7                | 1                | 0              | -1.823208               | 1.184889  | 0.601124  |
| 8                | 6                | 0              | -2.839270               | -0.623419 | -0.035176 |
| 9                | 1                | 0              | -2.909824               | -1.052829 | 0.964116  |
| 10               | 1                | 0              | -3.781992               | -0.121310 | -0.256869 |
| 11               | 1                | 0              | -2.706114               | -1.430504 | -0.755517 |
| 12               | 9                | 0              | 2.484069                | -0.862894 | -0.405974 |

---

### Triplet carbene from ethyl diazofluoroacetate

|                                              |                             |
|----------------------------------------------|-----------------------------|
| Zero-point correction=                       | 0.085774 (Hartree/Particle) |
| Thermal correction to Energy=                | 0.093345                    |
| Thermal correction to Enthalpy=              | 0.094289                    |
| Thermal correction to Gibbs Free Energy=     | 0.052403                    |
| Sum of electronic and zero-point Energies=   | -405.676476                 |
| Sum of electronic and thermal Energies=      | -405.668905                 |
| Sum of electronic and thermal Enthalpies=    | -405.667961                 |
| Sum of electronic and thermal Free Energies= | -405.709846                 |

---

| Center<br>Number | Atomic<br>Number | Atomic<br>Type | Coordinates (Angstroms) |           |           |
|------------------|------------------|----------------|-------------------------|-----------|-----------|
|                  |                  |                | X                       | Y         | Z         |
| 1                | 6                | 0              | 0.597545                | 0.192344  | -0.000001 |
| 2                | 8                | 0              | 0.778249                | 1.393200  | 0.000000  |
| 3                | 8                | 0              | -0.581202               | -0.434906 | 0.000000  |
| 4                | 6                | 0              | 1.689998                | -0.765652 | -0.000001 |
| 5                | 6                | 0              | -1.766399               | 0.409850  | 0.000001  |
| 6                | 1                | 0              | -1.733965               | 1.046885  | -0.883584 |
| 7                | 1                | 0              | -1.733964               | 1.046884  | 0.883586  |
| 8                | 6                | 0              | -2.973484               | -0.494581 | 0.000001  |
| 9                | 1                | 0              | -2.991669               | -1.129955 | 0.885621  |
| 10               | 1                | 0              | -3.878042               | 0.115401  | 0.000002  |
| 11               | 1                | 0              | -2.991670               | -1.129954 | -0.885620 |
| 12               | 9                | 0              | 2.940776                | -0.407487 | -0.000001 |

---

## Ethyl chlorodiazooacetate (2a)

|                                              |                             |
|----------------------------------------------|-----------------------------|
| Zero-point correction=                       | 0.094994 (Hartree/Particle) |
| Thermal correction to Energy=                | 0.103912                    |
| Thermal correction to Enthalpy=              | 0.104857                    |
| Thermal correction to Gibbs Free Energy=     | 0.060028                    |
| Sum of electronic and zero-point Energies=   | -875.635442                 |
| Sum of electronic and thermal Energies=      | -875.626523                 |
| Sum of electronic and thermal Enthalpies=    | -875.625579                 |
| Sum of electronic and thermal Free Energies= | -875.670408                 |

---

| Center<br>Number | Atomic<br>Number | Atomic<br>Type | Coordinates (Angstroms) |           |           |
|------------------|------------------|----------------|-------------------------|-----------|-----------|
|                  |                  |                | X                       | Y         | Z         |
| 1                | 6                | 0              | 0.145214                | -0.669677 | 0.000001  |
| 2                | 8                | 0              | 0.148421                | -1.877739 | 0.000004  |
| 3                | 8                | 0              | 1.236464                | 0.114283  | 0.000002  |
| 4                | 6                | 0              | -1.075013               | 0.133558  | -0.000001 |
| 5                | 6                | 0              | 2.523131                | -0.564760 | 0.000002  |
| 6                | 1                | 0              | 2.575562                | -1.200630 | -0.883065 |
| 7                | 1                | 0              | 2.575559                | -1.200637 | 0.883065  |
| 8                | 6                | 0              | 3.600419                | 0.491598  | 0.000008  |
| 9                | 1                | 0              | 3.535257                | 1.124040  | 0.885516  |
| 10               | 1                | 0              | 4.577583                | 0.006816  | 0.000007  |
| 11               | 1                | 0              | 3.535258                | 1.124048  | -0.885494 |
| 12               | 7                | 0              | -1.022856               | 1.433257  | -0.000003 |
| 13               | 7                | 0              | -0.983880               | 2.559330  | -0.000006 |
| 14               | 17               | 0              | -2.646686               | -0.590495 | -0.000005 |

---

### Ethyl chlorodiazacetate TS

|                                              |                             |
|----------------------------------------------|-----------------------------|
| Zero-point correction=                       | 0.091485 (Hartree/Particle) |
| Thermal correction to Energy=                | 0.101664                    |
| Thermal correction to Enthalpy=              | 0.102608                    |
| Thermal correction to Gibbs Free Energy=     | 0.054336                    |
| Sum of electronic and zero-point Energies=   | -875.590755                 |
| Sum of electronic and thermal Energies=      | -875.580576                 |
| Sum of electronic and thermal Enthalpies=    | -875.579632                 |
| Sum of electronic and thermal Free Energies= | -875.627904                 |

---

| Center<br>Number | Atomic<br>Number | Atomic<br>Type | Coordinates (Angstroms) |           |           |
|------------------|------------------|----------------|-------------------------|-----------|-----------|
|                  |                  |                | X                       | Y         | Z         |
| 1                | 6                | 0              | 0.109498                | -0.755614 | -0.267799 |
| 2                | 8                | 0              | 0.187240                | -1.951837 | -0.458582 |
| 3                | 8                | 0              | 1.126221                | 0.051391  | 0.027136  |
| 4                | 6                | 0              | -1.182311               | -0.104675 | -0.583039 |
| 5                | 6                | 0              | 2.450394                | -0.559886 | 0.080187  |
| 6                | 1                | 0              | 2.627263                | -1.074129 | -0.863290 |
| 7                | 1                | 0              | 2.452524                | -1.298344 | 0.881050  |
| 8                | 6                | 0              | 3.450441                | 0.542808  | 0.322769  |
| 9                | 1                | 0              | 3.256688                | 1.054253  | 1.265912  |
| 10               | 1                | 0              | 4.452454                | 0.114161  | 0.369288  |
| 11               | 1                | 0              | 3.431662                | 1.276963  | -0.482932 |
| 12               | 7                | 0              | -0.922778               | 1.718897  | -0.036928 |
| 13               | 7                | 0              | -1.008602               | 2.788647  | -0.257187 |
| 14               | 17               | 0              | -2.480984               | -0.656349 | 0.413390  |

---



### Singlet carbene from ethyl chlorodiazooacetate

|                                              |                             |
|----------------------------------------------|-----------------------------|
| Zero-point correction=                       | 0.083998 (Hartree/Particle) |
| Thermal correction to Energy=                | 0.092054                    |
| Thermal correction to Enthalpy=              | 0.092998                    |
| Thermal correction to Gibbs Free Energy=     | 0.050099                    |
| Sum of electronic and zero-point Energies=   | -766.047325                 |
| Sum of electronic and thermal Energies=      | -766.039269                 |
| Sum of electronic and thermal Enthalpies=    | -766.038324                 |
| Sum of electronic and thermal Free Energies= | -766.081224                 |

---

| Center<br>Number | Atomic<br>Number | Atomic<br>Type | Coordinates (Angstroms) |           |           |
|------------------|------------------|----------------|-------------------------|-----------|-----------|
|                  |                  |                | X                       | Y         | Z         |
| 1                | 6                | 0              | 0.184927                | 0.587207  | 0.199369  |
| 2                | 8                | 0              | 0.191560                | 1.730072  | -0.212012 |
| 3                | 8                | 0              | -0.830845               | -0.253915 | 0.234922  |
| 4                | 6                | 0              | 1.419040                | 0.130772  | 0.856072  |
| 5                | 6                | 0              | -2.128293               | 0.236328  | -0.241877 |
| 6                | 1                | 0              | -2.026926               | 0.480143  | -1.298334 |
| 7                | 1                | 0              | -2.366142               | 1.146643  | 0.305944  |
| 8                | 6                | 0              | -3.141248               | -0.853510 | -0.003750 |
| 9                | 1                | 0              | -3.224049               | -1.090941 | 1.056753  |
| 10               | 1                | 0              | -4.117135               | -0.514344 | -0.354385 |
| 11               | 1                | 0              | -2.881004               | -1.761715 | -0.547372 |
| 12               | 17               | 0              | 2.454293                | -0.627872 | -0.247340 |

---

### Triplet carbene from ethyl chlorodiazooacetate

|                                              |                             |
|----------------------------------------------|-----------------------------|
| Zero-point correction=                       | 0.084447 (Hartree/Particle) |
| Thermal correction to Energy=                | 0.092326                    |
| Thermal correction to Enthalpy=              | 0.093270                    |
| Thermal correction to Gibbs Free Energy=     | 0.050051                    |
| Sum of electronic and zero-point Energies=   | -766.044853                 |
| Sum of electronic and thermal Energies=      | -766.036974                 |
| Sum of electronic and thermal Enthalpies=    | -766.036030                 |
| Sum of electronic and thermal Free Energies= | -766.079249                 |

---

| Center<br>Number | Atomic<br>Number | Atomic<br>Type | Coordinates (Angstroms) |           |           |
|------------------|------------------|----------------|-------------------------|-----------|-----------|
|                  |                  |                | X                       | Y         | Z         |
| 1                | 6                | 0              | 0.106017                | 0.263991  | 0.000000  |
| 2                | 8                | 0              | 0.207319                | 1.475185  | 0.000012  |
| 3                | 8                | 0              | -1.044338               | -0.420646 | -0.000002 |
| 4                | 6                | 0              | 1.240552                | -0.634851 | -0.000010 |
| 5                | 6                | 0              | -2.267000               | 0.367223  | 0.000010  |
| 6                | 1                | 0              | -2.264668               | 1.006113  | -0.882979 |
| 7                | 1                | 0              | -2.264660               | 1.006097  | 0.883011  |
| 8                | 6                | 0              | -3.431339               | -0.591997 | 0.000006  |
| 9                | 1                | 0              | -3.420152               | -1.227891 | 0.885380  |
| 10               | 1                | 0              | -4.363255               | -0.024741 | 0.000020  |
| 11               | 1                | 0              | -3.420165               | -1.227869 | -0.885384 |
| 12               | 17               | 0              | 2.855275                | -0.258484 | -0.000010 |

---

**Ethyl bromodiazooacetate (2b)**

|                                              |                             |
|----------------------------------------------|-----------------------------|
| Zero-point correction=                       | 0.094643 (Hartree/Particle) |
| Thermal correction to Energy=                | 0.104651                    |
| Thermal correction to Enthalpy=              | 0.105595                    |
| Thermal correction to Gibbs Free Energy=     | 0.056173                    |
| Sum of electronic and zero-point Energies=   | -2989.633155                |
| Sum of electronic and thermal Energies=      | -2989.623147                |
| Sum of electronic and thermal Enthalpies=    | -2989.622203                |
| Sum of electronic and thermal Free Energies= | -2989.671625                |

---

| Center<br>Number | Atomic<br>Number | Atomic<br>Type | Coordinates (Angstroms) |           |           |
|------------------|------------------|----------------|-------------------------|-----------|-----------|
|                  |                  |                | X                       | Y         | Z         |
| 1                | 6                | 0              | 0.625321                | 0.976884  | 0.000007  |
| 2                | 8                | 0              | 0.904076                | 2.158615  | 0.000013  |
| 3                | 8                | 0              | 1.503291                | -0.026815 | 0.000004  |
| 4                | 6                | 0              | -0.756178               | 0.500631  | -0.000001 |
| 5                | 6                | 0              | 2.910216                | 0.343880  | 0.000014  |
| 6                | 1                | 0              | 3.105548                | 0.951091  | 0.883335  |
| 7                | 1                | 0              | 3.105555                | 0.951112  | -0.883291 |
| 8                | 6                | 0              | 3.716605                | -0.931093 | 0.000002  |
| 9                | 1                | 0              | 3.506474                | -1.530925 | -0.885684 |
| 10               | 1                | 0              | 4.779014                | -0.683323 | 0.000008  |
| 11               | 1                | 0              | 3.506467                | -1.530946 | 0.885671  |
| 12               | 7                | 0              | -1.692744               | 1.404981  | -0.000001 |
| 13               | 7                | 0              | -2.507385               | 2.180760  | -0.000001 |
| 14               | 35               | 0              | -1.338196               | -1.304383 | -0.000008 |

---

### Ethyl bromodiazacetate TS

|                                              |                             |
|----------------------------------------------|-----------------------------|
| Zero-point correction=                       | 0.090741 (Hartree/Particle) |
| Thermal correction to Energy=                | 0.101238                    |
| Thermal correction to Enthalpy=              | 0.102183                    |
| Thermal correction to Gibbs Free Energy=     | 0.052183                    |
| Sum of electronic and zero-point Energies=   | -2989.585955                |
| Sum of electronic and thermal Energies=      | -2989.575458                |
| Sum of electronic and thermal Enthalpies=    | -2989.574514                |
| Sum of electronic and thermal Free Energies= | -2989.624514                |

---

| Center<br>Number | Atomic<br>Number | Atomic<br>Type | Coordinates (Angstroms) |           |           |
|------------------|------------------|----------------|-------------------------|-----------|-----------|
|                  |                  |                | X                       | Y         | Z         |
| 1                | 6                | 0              | -0.548874               | 0.820818  | -0.055406 |
| 2                | 8                | 0              | -0.609430               | 1.894732  | -0.607604 |
| 3                | 8                | 0              | -1.589689               | 0.017120  | 0.194854  |
| 4                | 6                | 0              | 0.637450                | 0.246582  | 0.650300  |
| 5                | 6                | 0              | -2.911936               | 0.530483  | -0.145685 |
| 6                | 1                | 0              | -2.932358               | 0.730447  | -1.216092 |
| 7                | 1                | 0              | -3.057369               | 1.471881  | 0.382980  |
| 8                | 6                | 0              | -3.925744               | -0.510328 | 0.257870  |
| 9                | 1                | 0              | -3.888189               | -0.705321 | 1.329656  |
| 10               | 1                | 0              | -4.925500               | -0.149108 | 0.012084  |
| 11               | 1                | 0              | -3.763033               | -1.448141 | -0.273316 |
| 12               | 7                | 0              | 1.982542                | 1.571030  | 0.061922  |
| 13               | 7                | 0              | 2.798738                | 2.258958  | 0.301876  |
| 14               | 35               | 0              | 1.233859                | -1.386566 | -0.106353 |

---

### Singlet carbene from ethyl bromodiazooacetate

|                                              |                             |
|----------------------------------------------|-----------------------------|
| Zero-point correction=                       | 0.083536 (Hartree/Particle) |
| Thermal correction to Energy=                | 0.091728                    |
| Thermal correction to Enthalpy=              | 0.092672                    |
| Thermal correction to Gibbs Free Energy=     | 0.048645                    |
| Sum of electronic and zero-point Energies=   | -2880.043608                |
| Sum of electronic and thermal Energies=      | -2880.035416                |
| Sum of electronic and thermal Enthalpies=    | -2880.034472                |
| Sum of electronic and thermal Free Energies= | -2880.078498                |

---

| Center<br>Number | Atomic<br>Number | Atomic<br>Type | Coordinates (Angstroms) |           |           |
|------------------|------------------|----------------|-------------------------|-----------|-----------|
|                  |                  |                | X                       | Y         | Z         |
| 1                | 6                | 0              | 0.490229                | 0.745486  | 0.214700  |
| 2                | 8                | 0              | 0.574076                | 1.839008  | -0.311259 |
| 3                | 8                | 0              | 1.425501                | -0.181469 | 0.301778  |
| 4                | 6                | 0              | -0.749718               | 0.490605  | 0.953310  |
| 5                | 6                | 0              | 2.743037                | 0.137255  | -0.258065 |
| 6                | 1                | 0              | 3.107770                | 1.036256  | 0.236665  |
| 7                | 1                | 0              | 2.617158                | 0.348173  | -1.318737 |
| 8                | 6                | 0              | 3.638343                | -1.051085 | -0.016380 |
| 9                | 1                | 0              | 3.252345                | -1.943280 | -0.509409 |
| 10               | 1                | 0              | 4.628586                | -0.839551 | -0.422170 |
| 11               | 1                | 0              | 3.743731                | -1.257059 | 1.048616  |
| 12               | 35               | 0              | -2.002216               | -0.358240 | -0.123443 |

---

### Triplet carbene from ethyl bromodiazacetate

|                                              |                             |
|----------------------------------------------|-----------------------------|
| Zero-point correction=                       | 0.083832 (Hartree/Particle) |
| Thermal correction to Energy=                | 0.091930                    |
| Thermal correction to Enthalpy=              | 0.092875                    |
| Thermal correction to Gibbs Free Energy=     | 0.048175                    |
| Sum of electronic and zero-point Energies=   | -2880.041403                |
| Sum of electronic and thermal Energies=      | -2880.033305                |
| Sum of electronic and thermal Enthalpies=    | -2880.032360                |
| Sum of electronic and thermal Free Energies= | -2880.077060                |

---

| Center<br>Number | Atomic<br>Number | Atomic<br>Type | Coordinates (Angstroms) |           |           |
|------------------|------------------|----------------|-------------------------|-----------|-----------|
|                  |                  |                | X                       | Y         | Z         |
| 1                | 6                | 0              | -0.612571               | 0.306041  | 0.000003  |
| 2                | 8                | 0              | -0.545892               | 1.519801  | 0.000011  |
| 3                | 8                | 0              | -1.745309               | -0.408746 | 0.000006  |
| 4                | 6                | 0              | 0.543088                | -0.565237 | -0.000008 |
| 5                | 6                | 0              | -2.989526               | 0.344905  | 0.000018  |
| 6                | 1                | 0              | -3.005075               | 0.983589  | -0.883005 |
| 7                | 1                | 0              | -3.005061               | 0.983584  | 0.883045  |
| 8                | 6                | 0              | -4.125770               | -0.647566 | 0.000024  |
| 9                | 1                | 0              | -4.095698               | -1.282914 | 0.885318  |
| 10               | 1                | 0              | -5.073999               | -0.108227 | 0.000037  |
| 11               | 1                | 0              | -4.095716               | -1.282906 | -0.885276 |
| 12               | 35               | 0              | 2.306109                | -0.137441 | -0.000014 |

---

## N2

|                                              |                             |
|----------------------------------------------|-----------------------------|
| Zero-point correction=                       | 0.005582 (Hartree/Particle) |
| Thermal correction to Energy=                | 0.007943                    |
| Thermal correction to Enthalpy=              | 0.008887                    |
| Thermal correction to Gibbs Free Energy=     | -0.012842                   |
| Sum of electronic and zero-point Energies=   | -109.559414                 |
| Sum of electronic and thermal Energies=      | -109.557054                 |
| Sum of electronic and thermal Enthalpies=    | -109.556110                 |
| Sum of electronic and thermal Free Energies= | -109.577839                 |

---

| Center<br>Number | Atomic<br>Number | Atomic<br>Type | Coordinates (Angstroms) |          |           |
|------------------|------------------|----------------|-------------------------|----------|-----------|
|                  |                  |                | X                       | Y        | Z         |
| 1                | 7                | 0              | 0.000000                | 0.000000 | 0.545399  |
| 2                | 7                | 0              | 0.000000                | 0.000000 | -0.545399 |

---
